# Supplementary figures and images for: 5-Ammoniumvaleric acid stabilized mixed-dimensional perovskite submicron platelets with white light emission
Source: Royal Society of Chemistry journal article supplement (doi:10.1039/d0na00462f), 2020-01-01

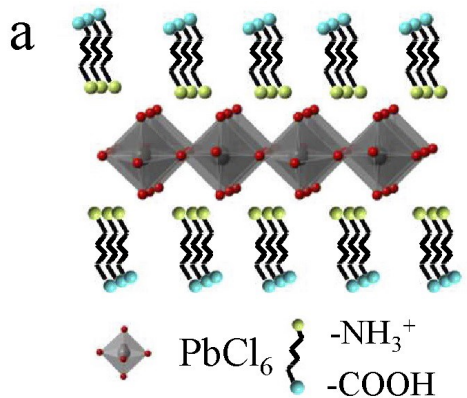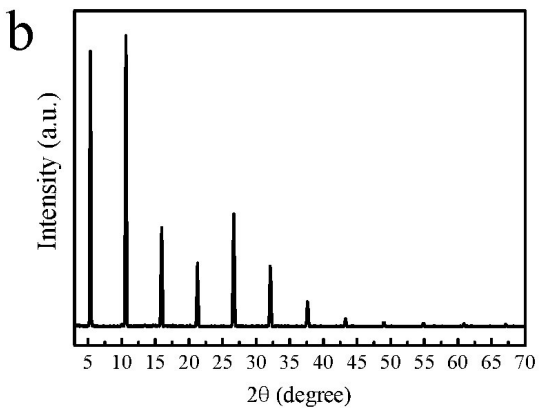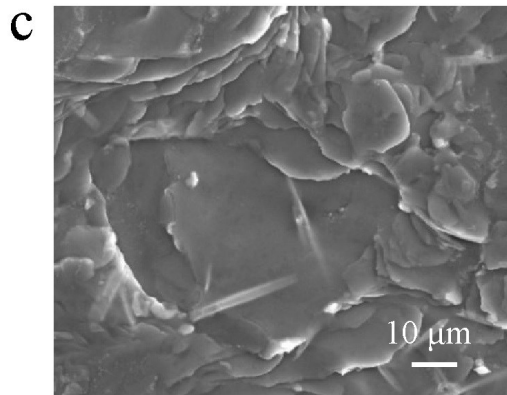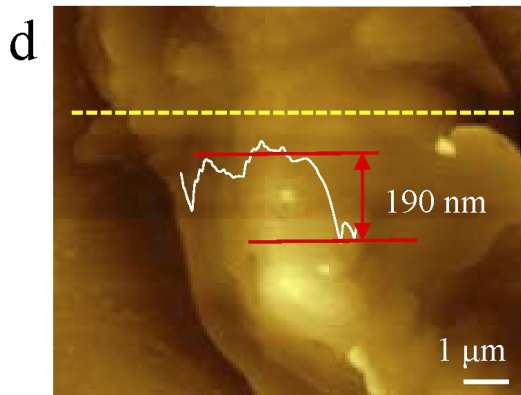

Supplement: d0na00462f4.pdf [file d0na00462f4.pdf]

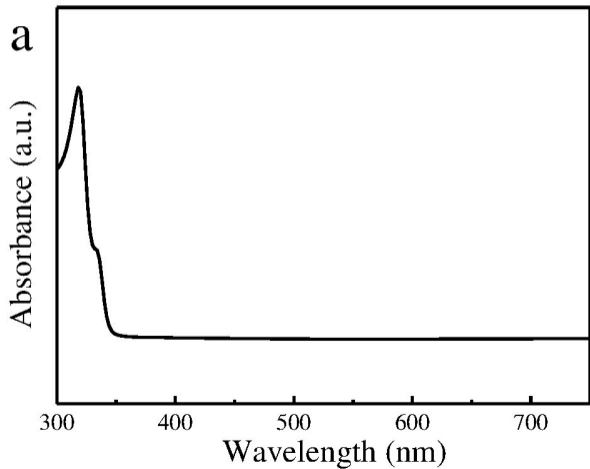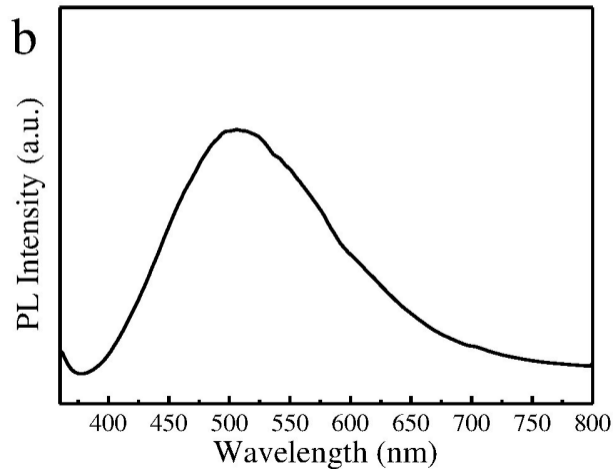

Supplement: d0na00462f5.pdf [file d0na00462f5.pdf]

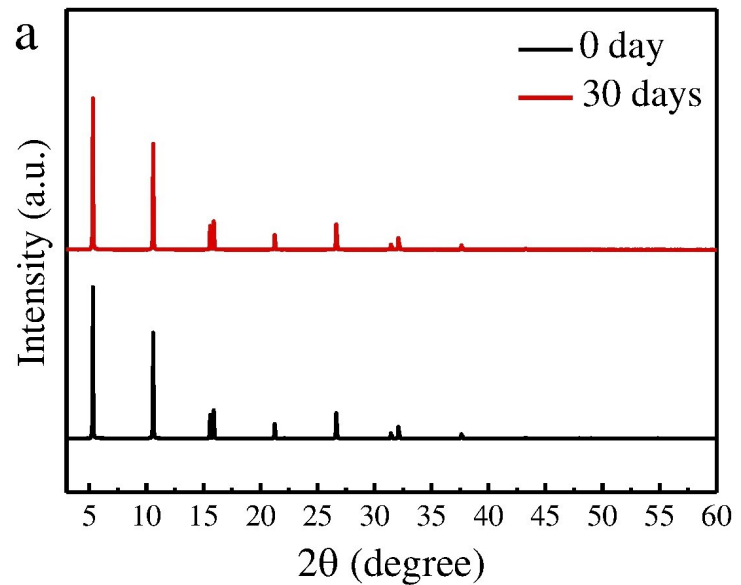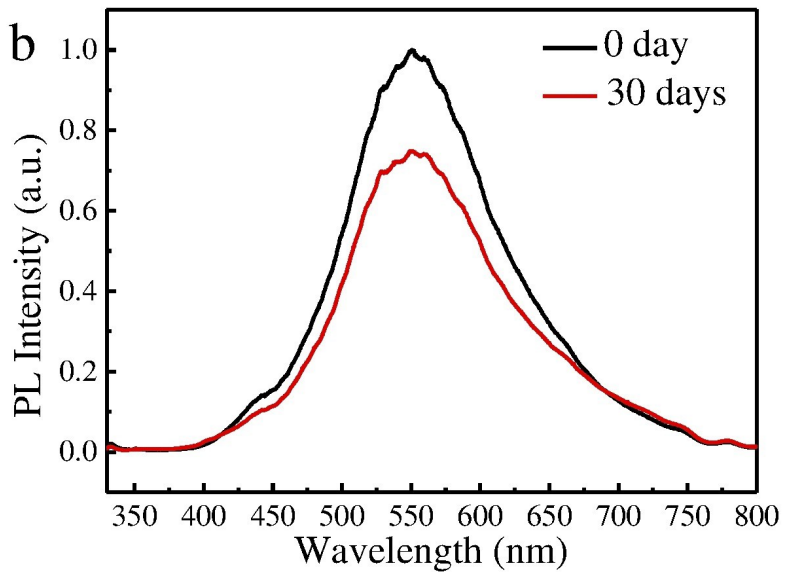

Supplement: d0na00462f6.pdf [file d0na00462f6.pdf]
